# Supplementary material for: SWO1 modulates cell wall integrity under salt stress by interacting with importin ɑ in Arabidopsis
Source: PubMed Central journal article supplement (PMC10442049; doi:10.1007/s44154-021-00010-5), 2021-09-29

Figure S5

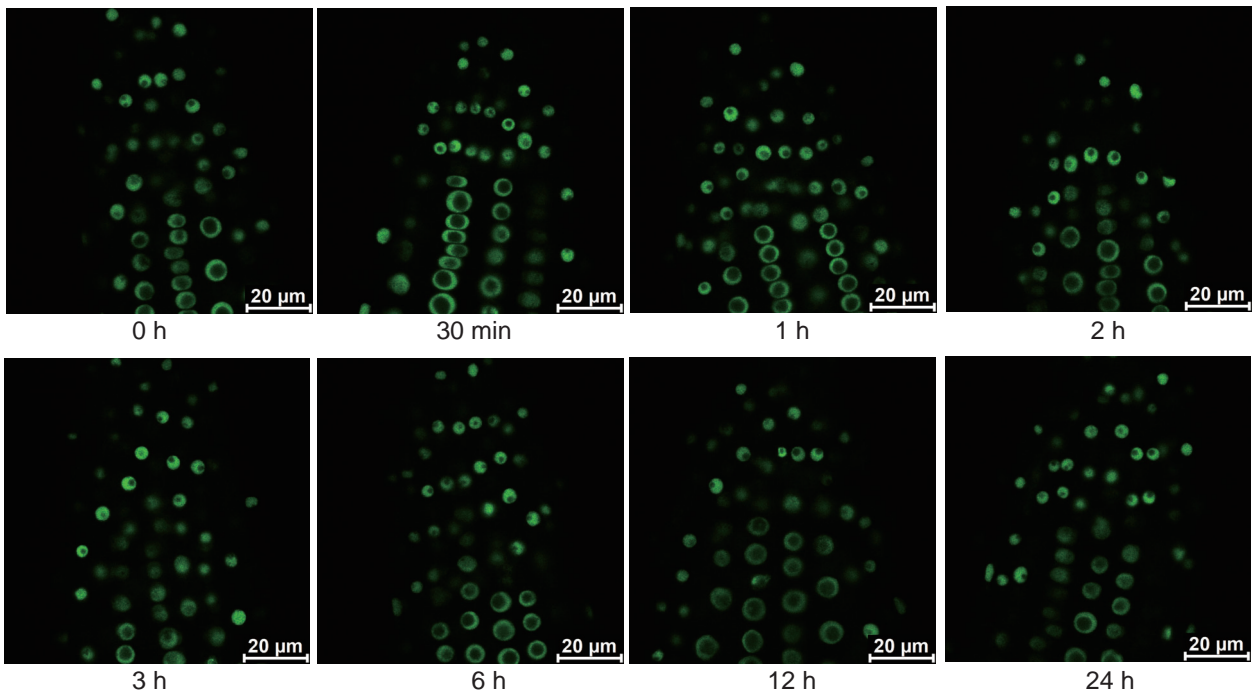

Supplement: 44154_2021_10_MOESM5_ESM.pdf [file 44154_2021_10_MOESM5_ESM.pdf]
