# Supplementary material for: SWO1 modulates cell wall integrity under salt stress by interacting with importin ɑ in Arabidopsis
Source: PubMed Central journal article supplement (PMC10442049; doi:10.1007/s44154-021-00010-5), 2021-09-29
Supplement: 44154_2021_10_MOESM11_ESM.pdf [file 44154_2021_10_MOESM11_ESM.pdf]

**Table S3. Shown are the class III peroxidases, cell wall loosening, and cell wall biogenesis and modification-related genes that are differentially expressed in *swo1-2* after salt treatment for 14 h**

| Locus                                 | Annotation                                                  | log <sub>2</sub> ( <i>swo1</i> / WT) | P-value  |
|---------------------------------------|-------------------------------------------------------------|--------------------------------------|----------|
| Class III peroxidases                 |                                                             |                                      |          |
| AT1G05250                             | Prx02                                                       | 1.22                                 | 4.14E-02 |
| AT1G14540                             | Prx04                                                       | 0.713                                | 4.70E-02 |
| AT1G68850                             | Prx11                                                       | 1.049                                | 1.45E-05 |
| AT2G35380                             | Prx20                                                       | 0.736                                | 1.91E-02 |
| AT2G38380                             | Prx22                                                       | 0.717                                | 1.02E-06 |
| AT4G26010                             | Prx44                                                       | 1.06                                 | 6.67E-03 |
| AT4G33420                             | Prx47                                                       | 0.652                                | 8.95E-03 |
| AT5G06730                             | Prx54                                                       | 0.864                                | 3.37E-03 |
| Cell wall loosening                   |                                                             |                                      |          |
| AT1G69530                             | EXPA1                                                       | -0.754                               | 3.05E-02 |
| AT2G39700                             | EXPA4                                                       | -0.918                               | 5.05E-07 |
| AT1G20190                             | EXPA11                                                      | -0.703                               | 1.12E-03 |
| AT5G56320                             | EXPA14                                                      | -1.028                               | 2.29E-05 |
| AT4G38210                             | EXPA20                                                      | -0.682                               | 4.80E-04 |
| AT4G28250                             | EXPB3                                                       | -1.269                               | 1.12E-12 |
| AT3G45970                             | EXLA1                                                       | 0.778                                | 6.17E-06 |
| AT4G38400                             | EXLA2                                                       | 1.128                                | 1.62E-05 |
| AT3G45960                             | EXLA3                                                       | 0.737                                | 3.68E-02 |
| AT4G17030                             | EXLB1                                                       | 1.245                                | 5.60E-25 |
| Cell wall biogenesis and modification |                                                             |                                      |          |
| AT1G11545                             | XTH8                                                        | -0.739                               | 9.56E-04 |
| AT5G62380                             | NAC101                                                      | -1.049                               | 1.11E-02 |
| AT5G22940                             | F8H                                                         | -0.894                               | 5.96E-06 |
| AT1G48100                             | PGX3                                                        | -1.016                               | 2.04E-04 |
| AT1G68560                             | XYL1                                                        | -0.74                                | 7.34E-12 |
| AT2G45890                             | ROPGEF4                                                     | -0.775                               | 4.96E-02 |
| AT1G70710                             | GH9B1                                                       | -0.866                               | 2.20E-07 |
| AT1G14080                             | FUT6                                                        | -1.075                               | 4.33E-07 |
| AT1G67330                             | AGM2                                                        | -0.901                               | 2.39E-12 |
| AT4G00730                             | ANL2                                                        | -0.833                               | 2.92E-08 |
| AT1G03870                             | FLA9                                                        | -0.897                               | 2.09E-04 |
| AT2G33790                             | AGP30                                                       | -2.343                               | 1.85E-21 |
| AT1G28290                             | AGP31                                                       | -1.134                               | 3.58E-17 |
| AT4G01770                             | RGXT1                                                       | -1.406                               | 7.32E-08 |
| AT3G50760                             | GATL2                                                       | -0.743                               | 9.72E-04 |
| AT3G14310                             | PME3                                                        | -0.61                                | 1.07E-05 |
| AT5G47500                             | PME5                                                        | -1.798                               | 1.61E-09 |
| AT1G11580                             | PMEPCRA                                                     | -1.013                               | 9.72E-12 |
| AT3G10720                             | Plant invertase/pectin methylesterase inhibitor superfamily | -1.057                               | 3.13E-17 |
| AT1G02810                             | Plant invertase/pectin methylesterase inhibitor superfamily | -0.608                               | 1.47E-03 |
| AT1G02460                             | Pectin lyase-like superfamily protein                       | -1.976                               | 1.29E-06 |
| AT3G54260                             | TBL36                                                       | -0.861                               | 8.05E-05 |
| AT2G34070                             | TBL37                                                       | -1.181                               | 2.55E-12 |
| AT2G42570                             | TBL39                                                       | -0.632                               | 4.50E-08 |
| AT4G22680                             | MYB85                                                       | 1.011                                | 9.01E-07 |
