# Supplementary material for: SWO1 modulates cell wall integrity under salt stress by interacting with importin ɑ in Arabidopsis
Source: PubMed Central journal article supplement (PMC10442049; doi:10.1007/s44154-021-00010-5), 2021-09-29
Supplement: 44154_2021_10_MOESM13_ESM.pdf [file 44154_2021_10_MOESM13_ESM.pdf]

**Table S5. NPC, NE components, and factors involved in epigenetic regulation were identified in SWO1 IP-MS**

| Protein | Replicate I    |       | Replicate II   |       | Replicate III  |       |
|---------|----------------|-------|----------------|-------|----------------|-------|
|         | Unique Peptide | Score | Unique Peptide | Score | Unique Peptide | Score |
| SWO1    | 51             | 6817  | 98             | 6623  | 107            | 8068  |
| Nup98a  | NA             | NA    | 3              | 45    | 3              | 65    |
| Nup54   | NA             | NA    | NA             | NA    | 2              | 23    |
| Nup96   | NA             | NA    | NA             | NA    | 3              | 70    |
| Nup155  | NA             | NA    | 1              | 30    | NA             | NA    |
| Nup35   | 1              | 16    | NA             | NA    | NA             | NA    |
| RAE1    | NA             | NA    | 1              | 24    | NA             | NA    |
| LOS4    | NA             | NA    | 1              | 44    | NA             | NA    |
| THO2    | NA             | NA    | 3              | 60    | NA             | NA    |
| LINC4   | NA             | NA    | 6              | 90    | 6              | 59    |
| SUN1    | NA             | NA    | 2              | 24    | NA             | NA    |
| WIT1    | 2              | 17    | NA             | NA    | 1              | 37    |
| UBP12   | NA             | NA    | 4              | 40    | NA             | NA    |
| UBP13   | NA             | NA    | NA             | NA    | 2              | 63    |
| CHR11   | NA             | NA    | 4              | 79    | 4              | 58    |
